# Supplementary material for: Hierarchical manganese dioxide nanoflowers enable accurate ratiometric fluorescence enzyme-linked immunosorbent assay
Source: Royal Society of Chemistry journal article supplement (doi:10.1039/c8nr07096b), 2018-01-01
Supplement: c8nr07096b1.pdf [file c8nr07096b1.pdf]

# Hierarchical manganese dioxide nanoflowers enable accurate ratiometric fluorescence enzyme-linked immunosorbent assay

Lei Jiao<sup>a,1</sup>, Lianhua Zhang<sup>b,1</sup>, Wenwen Du<sup>a</sup>, He Li<sup>a,c,\*</sup>, Dingyu Yang<sup>a</sup>, Chengzhou Zhu<sup>d\*</sup>

<sup>a</sup> College of Optoelectronics Technology, Chengdu University of Information Technology, Chengdu 610225, China

E-mail: lihecd@gmail.com (H. Li)

<sup>b</sup> Renji Hospital, Shanghai Jiao Tong University School of Medicine, Shanghai 200127, China

<sup>c</sup> Institute of Surface Analysis and Chemical Biology, University of Jinan, Jinan 250022, China

<sup>d</sup> Key Laboratory of Pesticide and Chemical Biology, Ministry of Education, College of Chemistry, Central China Normal University, Wuhan 430079, China

E-mail: czzhu@mail.ccnu.edu.cn (C. Zhu)

## EXPERIMENTAL SECTION

**Materials and instruments.** Potassium permanganate ( $\text{KMnO}_4$ ) and hydrochloric acid were obtained from Laiyang Fine Chemical Factory. Citric acid, o-phenylenediamine (OPD), bovine serum albumin (BSA), 1-(3-Dimethylaminopropyl)-3-ethylcarbodiimide hydrochloride (EDC) and N-hydroxysuccinimide (NHS) were purchased from Shanghai Macklin biochemical technology Co., Ltd. Carbon dots (CDs) kindly provided by Yang, was synthesized by his previous work.<sup>1</sup> CRP and its antibodies were purchased from Shanghai Linc-Bio Science Co. LTD. Acetic acid (HAC), sodium acetate (NaAC),  $\text{Na}_2\text{HPO}_4$ ,  $\text{KH}_2\text{PO}_4$  and KCl were obtained from Sinopharm Chemical Reagent Beijing Co., Ltd.

Scanning electron microscope (SEM) was operated using a field emission SEM (ZEISS, Germany). Transmission electron microscope (TEM) was recorded by a Philips CM200 UT (Field Emission Instruments, USA). X-ray photoelectron spectroscopy (XPS) was obtained by an XSAM800 multifunctional surface analysis electron spectrometer (Kratos, UK). Fourier transform infrared spectroscopy (FTIR) spectrum was measured by VERTEX 70 spectrometer (Bruker, Germany). The X-ray diffraction (XRD) was conducted from  $10^\circ$  to  $70^\circ$  (Bruker AXS, Germany). All UV-vis spectrum and fluorescent spectrum were measured through a multimode microplate reader (TECAN SPARK 20M, Switzerland).

**Preparation of  $\text{MnO}_2$  NFs.** 80 mg of  $\text{KMnO}_4$  was dissolved in 40 mL of hydrochloric acid (0.1 mol/L) solution to obtain a homogeneous wine solution. After that, 1 mL of citric acid (100 mM) was added into the solution and stirred 30 minutes at room temperature, emerging a brown suspension from wine solution. The products ( $\text{MnO}_2$  NFs) were centrifuged and washed several times and dried under vacuum at  $50^\circ\text{C}$ .

**Ratiometric fluorescence immunoassay of CRP.**  $\text{MnO}_2$  NFs (0.5 mg/mL, 1 mL) was adjusted by  $\text{K}_2\text{CO}_3$  to be pH 6.0 under vigorous ultrasonication for 1 hour. Then,  $\text{MnO}_2$  NFs was activated by EDC (2 mg/mL) and NHS (4 mg/mL) for gently shaking for 30 minutes. The mixture was centrifuged and washed for 3 times.  $\text{Ab}_2$  (100  $\mu\text{g/mL}$ , 1 mL) in PBS was incubated with active  $\text{MnO}_2$  NFs for 1 hour at  $37^\circ\text{C}$  and centrifuged 3 times to remove unbonded antibodies. The products were passivated with 1% BSA for 30 minutes and dispersed in 1 mL of PBS stored at  $4^\circ\text{C}$  for further use.

100  $\mu\text{L}$  of  $\text{Ab}_1$  with a concentration of 1  $\mu\text{g/mL}$  diluted in PBS (pH 7.4) was incubated with 96-

well plates for 12 h at 4 °C. Next, these plates were washed with PBS (pH 7.4) for 3 times to remove unbonded antibodies. Afterwards, 200  $\mu$ L of BSA (1%) diluted in PBS (pH 7.4) was added and incubated for 30 minutes at 37 °C to block nonspecific active sites and washed for 3 times to remove excess BSA. Next, 100  $\mu$ L of different concentration of CRP was added into each well and incubated for 30 minutes at 37 °C. After that, each well was washed with PBS (pH 7.4) for 3 times to remove unbonded antigen. And 100  $\mu$ L of MnO<sub>2</sub> NFs-Ab<sub>2</sub> (0.5 mg/mL) was subsequently added into each well and incubated for 60 minutes at 37 °C. Each well was washed 3 times with PBS (pH 7.4) to remove unbonded MnO<sub>2</sub> NFs-Ab<sub>2</sub>. Finally, 10  $\mu$ L of CDs (0.02 mg/mL) was added into each well rapidly and 200  $\mu$ L of OPD (15 mM) diluted in HAC-NaAC (pH 4.0) was incubated for 7 minutes at 37 °C. The fluorescence emission spectra were recorded at excitation spectrum of 365 nm.

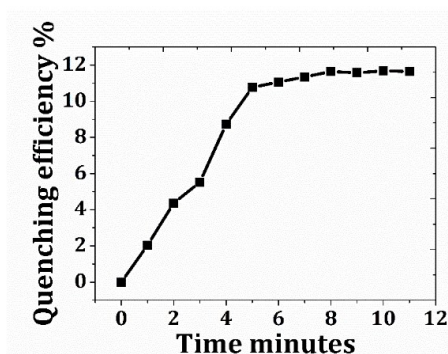

**Figure S1** The fluorescent quenching efficiency of MnO<sub>2</sub> NFs towards CDs at different time.

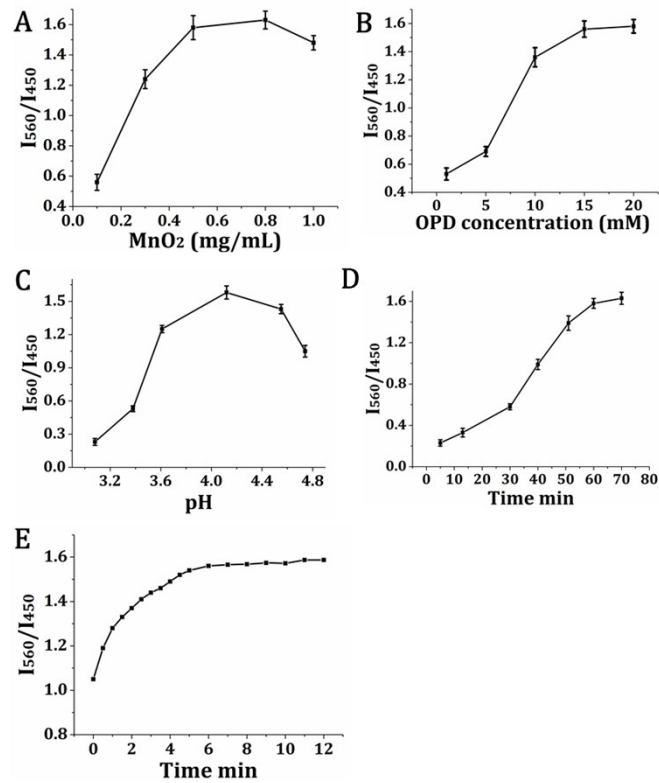

**Figure S2** Optimized experimental conditions of ratiometric fluorescence ELISA: (A) MnO<sub>2</sub> NFs concentration; (B) OPD concentration; (C) pH; (D) incubation time of recognition between antigen and MnO<sub>2</sub> NFS-Ab<sub>2</sub>; (E) incubation time of immunosensor with OPD and CDs.

**Table S1** Comparison of the developed method with other methods

| Method               | Signal output            | Detection ranges     | Limit of detection | references |
|----------------------|--------------------------|----------------------|--------------------|------------|
| Aptasensor           | electrochemical          | 5 pg/mL-125 ng/mL    | 0.0017 ng/mL       | 2          |
| Microfluidic device. | colorimetric             | 0.005 µg/mL-5 µg/mL  | 0.0005 µg/mL       | 3          |
| Microfluidic device  | chemiluminescence        | 50 ng/mL-300 ng/mL   | 4.27 ng/mL         | 4          |
| ELISA                | Electrochemical          | 0 pg/mL-200pg/mL     | 12.5 pg/mL         | 5          |
| Microfluidic device  | Colorimetric             | 1 ng/mL-81 ng/mL     | 1.0 ng/mL          | 6          |
| ELISA                | Ratiometric fluorescence | 0.001 ng/mL-50 ng/mL | 0.67 pg/mL         | This work  |

**Table S2** The recovery of the fabricated immunosensor in human serum

| Sample | Added (ng/mL) | Found (ng/mL) | Recovery (%) |
|--------|---------------|---------------|--------------|
| 1      | 1.00          | 0.91          | 91.00        |
| 2      | 1.50          | 1.46          | 97.33        |
| 3      | 2.00          | 2.08          | 104.00       |
| 4      | 2.50          | 2.54          | 101.60       |
| 5      | 3.00          | 3.09          | 103.00       |

## References

- 1 S. Zhu, Q. Meng, L. Wang, J. Zhang, Y. Song, H. Jin, K. Zhang, H. Sun, H. Wang and B. Yang, *Angew. Chem. Int. Ed.*, 2013, **125**, 4045-4049.
- 2 J. Wang, J. Guo, J. Zhang, W. Zhang and Y. Zhang, *Biosens. Bioelectron.*, 2017, **95**, 100-105.
- 3 J. Park and J.-K. Park, *Sens. Actuat. B-Chem.*, 2017, **246**, 1049-1055.
- 4 B. Hu, J. Li, L. Mou, Y. Liu, J. Deng, W. Qian, J. Sun, R. Cha and X. Jiang, *Lab on a Chip*, 2017, **17**, 2225-2234.
- 5 D. S. Juang, C.-H. Lin, Y.-R. Huo, C.-Y. Tang, C.-R. Cheng, H.-S. Wu, S.-F. Huang, A. Kalnitsky and C.-C. Lin, *Biosens. Bioelectron.*, 2018, **117**, 175-182.
- 6 Y. Zhao, G. Czilwik, V. Klein, K. Mitsakakis, R. Zengerle and N. Paust, *Lab on a Chip*, 2017, **17**, 1666-1677.
